# Supplementary material
Source: publisher figshare collection journal article supplement (https://acs.figshare.com/ndownloader/files/5074825)
Supplement: Supplementary file 1 [file 5074825]

## **Supplementary Material**

From the available kinetic and mechanistic data for 8:2 FTOH and analogous compounds the atmospheric oxidation mechanism for 8:2 FTOH shown in Table 1 was constructed. For convenience, the mechanism can be broken down into four pieces: oxidation of  $\text{C}_8\text{F}_{17}\text{CH}_2\text{CH}_2\text{OH}$ ,  $\text{C}_8\text{F}_{17}\text{CH}_2\text{CHO}$ ,  $\text{C}_8\text{F}_{17}\text{CHO}$ , and fate of  $\text{C}_8\text{F}_{17}\text{O}_2$  radicals. Wet and dry deposition rates used in the model are discussed in section 2.1.5.

### **2.1.1 Atmospheric oxidation of $\text{C}_8\text{F}_{17}\text{CH}_2\text{CH}_2\text{OH}$**

The atmospheric degradation of  $\text{C}_8\text{F}_{17}\text{CH}_2\text{CH}_2\text{OH}$  is initiated by reaction with OH radicals. Measurements at ambient temperature indicate this reaction proceeds with a rate constant of  $1.1 \times 10^{-12} \text{ cm}^3 \text{ molecule}^{-1} \text{ s}^{-1}$  (1,2). By analogy with reactions of OH with other fluorinated organic compounds it seems likely that the temperature dependence of reaction (1) can be described using an exponential term in the Arrhenius expression of  $E_a/R = 1000$  (3). Hence, we arrive at an estimate of  $k(\text{OH} + \text{C}_8\text{F}_{17}\text{CH}_2\text{CH}_2\text{OH}) = 3.2 \times 10^{-11} \exp(-1000/T) \text{ cm}^3 \text{ molecule}^{-1} \text{ s}^{-1}$ .

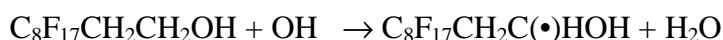

As indicated above, the reaction of OH radicals with 8:2 FTOH proceeds via attack on the  $\text{CH}_2$  group  $\alpha$  to the  $-\text{OH}$  group. The resulting  $\alpha$ -hydroxy alkyl radical reacts with  $\text{O}_2$  to give the aldehyde  $\text{C}_8\text{F}_{17}\text{CH}_2\text{CHO}$ .

### **2.1.2 Atmospheric oxidation of $\text{C}_8\text{F}_{17}\text{CH}_2\text{CHO}$**

Photolysis and reaction with OH radicals are potential competing loss mechanisms for  $\text{C}_8\text{F}_{17}\text{CH}_2\text{CHO}$ . Unfortunately, there are no data concerning the rates of these processes. By analogy to the existing data for  $\text{CF}_3\text{CH}_2\text{CHO}$  (4,5), it is likely that reaction with OH radicals dominates the atmospheric loss of  $\text{C}_8\text{F}_{17}\text{CH}_2\text{CHO}$ . For

simplicity, and in the absence of evidence to the contrary, we will assume that (i) reaction with OH is the sole atmospheric loss of C<sub>8</sub>F<sub>17</sub>CH<sub>2</sub>CHO and (ii) this reaction proceeds at the same rate as OH + CF<sub>3</sub>CH<sub>2</sub>CHO. From the measurements of Sellevåg et al. (5) at 298 K an average value of  $k_2 = 3.5 \times 10^{-12} \text{ cm}^3 \text{ molecule}^{-1} \text{ s}^{-1}$  at ambient temperature can be derived. Assuming an exponential factor of  $E_a/R = 1000$  we arrive at  $k(\text{OH} + \text{C}_8\text{F}_{17}\text{CH}_2\text{CHO}) = 1.0 \times 10^{-10} \exp(-1000/T) \text{ cm}^3 \text{ molecule}^{-1} \text{ s}^{-1}$ .

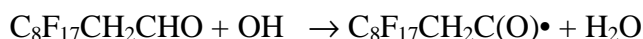

Based upon the behavior of CH<sub>3</sub>C(O) and CF<sub>3</sub>C(O) radicals we assume that the atmospheric fate of C<sub>8</sub>F<sub>17</sub>CH<sub>2</sub>C(O) radicals is addition of O<sub>2</sub> to give an acyl peroxy radical, C<sub>8</sub>F<sub>17</sub>CH<sub>2</sub>C(O)O<sub>2</sub>. It seems reasonable to assume that the C<sub>8</sub>F<sub>17</sub>CH<sub>2</sub>C(O)O<sub>2</sub> radical will react in the atmosphere with NO, NO<sub>2</sub>, and HO<sub>2</sub> with similar rates and mechanisms as the well understood reactions involving CH<sub>3</sub>C(O)O<sub>2</sub> radicals (6).

Proceeding on this assumption, reaction with NO will proceed with a rate constant of  $8.1 \times 10^{-12} \exp(270/T) \text{ cm}^3 \text{ molecule}^{-1} \text{ s}^{-1}$  and give C<sub>8</sub>F<sub>17</sub>CH<sub>2</sub>(•) radicals which will add O<sub>2</sub> to give the peroxy radical which in turn will be converted into the perfluoroaldehyde, C<sub>8</sub>F<sub>17</sub>CHO:

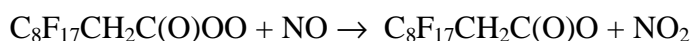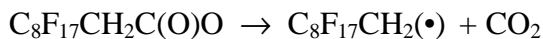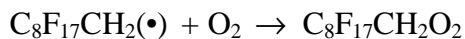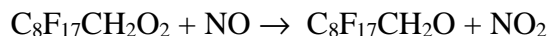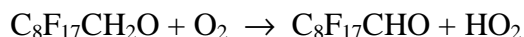

Reaction of the C<sub>8</sub>F<sub>17</sub>CH<sub>2</sub>C(O)OO radical with NO<sub>2</sub> will proceed with a rate constant of  $1.1 \times 10^{-11} (T/298)^{-1.0} \text{ cm}^3 \text{ molecule}^{-1} \text{ s}^{-1}$  to give the peroxyacetyl nitrate

$\text{C}_8\text{F}_{17}\text{CH}_2\text{C}(\text{O})\text{OONO}_2$  which will slowly (within a few hours at ambient temperature, and few days at lower temperatures) decompose to reform the reactants:

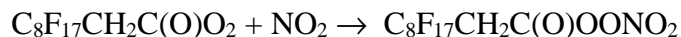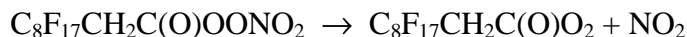

Reaction of  $\text{C}_8\text{F}_{17}\text{CH}_2\text{C}(\text{O})\text{O}_2$  with  $\text{HO}_2$  will have a rate constant of  $4.3 \times 10^{-13} \exp(1040/T) \text{ cm}^3 \text{ molecule}^{-1} \text{ s}^{-1}$  and give the acid ( $\text{C}_8\text{F}_{17}\text{CH}_2\text{C}(\text{O})\text{OH}$ ), peracid ( $\text{C}_8\text{F}_{17}\text{CH}_2\text{C}(\text{O})\text{OOH}$ ), and  $\text{C}_8\text{F}_{17}\text{CH}_2\text{C}(\text{O})\text{O} + \text{O}_2 + \text{OH}$  as products:

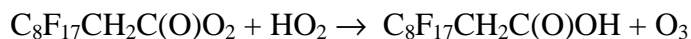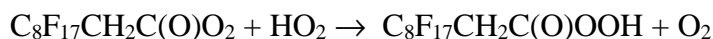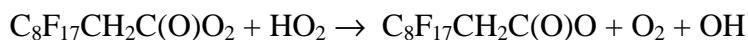

The acid ( $\text{C}_8\text{F}_{17}\text{CH}_2\text{C}(\text{O})\text{OH}$ ) and peracid ( $\text{C}_8\text{F}_{17}\text{CH}_2\text{C}(\text{O})\text{OOH}$ ) are likely to be relatively unreactive with respect to further gas-phase chemistry and will probably be lost from the atmosphere via wet and/or dry deposition. We will not consider the fate of these products further. As described above,  $\text{C}_8\text{F}_{17}\text{CH}_2\text{C}(\text{O})\text{O}$  radicals are expected to be converted into  $\text{C}_8\text{F}_{17}\text{CHO}$ . Based upon the latest information for the  $\text{CH}_3\text{C}(\text{O})\text{O}_2 + \text{HO}_2$  reaction (7), we assume that the yield of  $\text{C}_8\text{F}_{17}\text{CHO}$  is 40% with the balance of reaction giving the acid and peracid. We assume that this branching is independent of temperature.

### **2.1.3 Atmospheric oxidation of $\text{C}_8\text{F}_{17}\text{CHO}$**

Oxidation of  $\text{C}_8\text{F}_{17}\text{CHO}$  is initiated by both reaction with OH radicals and photolysis. Sellevåg et al. (5) have established an upper limit of  $\Phi \leq 0.02$  for the photodissociation quantum yield of  $\text{CF}_3\text{CHO}$  in sunlight. We assume  $\Phi = 0.02$  for the photodissociation quantum yield of  $\text{C}_8\text{F}_{17}\text{CHO}$ . While there is no available UV

spectrum for C<sub>8</sub>F<sub>17</sub>CHO, spectra of CF<sub>3</sub>CHO, C<sub>2</sub>F<sub>5</sub>CHO, C<sub>3</sub>F<sub>7</sub>CHO, and C<sub>4</sub>F<sub>9</sub>CHO are available (8). The spectra are similar in shape and have a maximum absorption at 305-310 nm. There is a systematic increase in the intensity of absorption with size of the fluorinated chain up to C<sub>3</sub>F<sub>7</sub>CHO, but relatively little difference between C<sub>3</sub>F<sub>7</sub>CHO and C<sub>4</sub>F<sub>9</sub>CHO. We assume that the UV spectrum of C<sub>4</sub>F<sub>9</sub>CHO (8) serves as a good model for that of C<sub>8</sub>F<sub>17</sub>CHO. As with CH<sub>3</sub>CHO, the photolysis of C<sub>8</sub>F<sub>17</sub>CHO in the troposphere is expected to proceed via C-C bond scission. The resulting C<sub>8</sub>F<sub>17</sub> radical will add O<sub>2</sub> and can not be a source of C<sub>8</sub>F<sub>17</sub>COOH but can undergo reactions leading to formation of shorter chain perfluorocarboxylic acids, C<sub>x</sub>F<sub>2x+1</sub>COOH (x=1-7) (9).

There are no available kinetic data for the reaction of OH radicals with C<sub>8</sub>F<sub>17</sub>CHO. Kinetic data are available at ambient temperature (296-298 K) for reaction of OH with CF<sub>3</sub>CHO (10,11,4,12), C<sub>2</sub>F<sub>5</sub>CHO (13,12), C<sub>3</sub>F<sub>7</sub>CHO (12), and C<sub>4</sub>F<sub>9</sub>CHO (12). Within the experimental uncertainties, there is no discernable effect of the C<sub>x</sub>F<sub>2x+1</sub> chain length on the reactivity of C<sub>x</sub>F<sub>2x+1</sub>CHO towards OH radicals (12). Taking an average of the published data (except reference 11 which is less precise, but consistent with, the body of data) we arrive at a value of  $k(\text{OH} + \text{C}_x\text{F}_{2x+1}\text{CHO}) = 6 \times 10^{-13} \text{ cm}^3 \text{ molecule}^{-1} \text{ s}^{-1}$  at 298 K. Assuming an  $E_a/R$  term = 1000 gives  $k(\text{OH} + \text{C}_8\text{F}_{17}\text{CHO}) = 1.7 \times 10^{-11} \exp(-1000/T) \text{ cm}^3 \text{ molecule}^{-1} \text{ s}^{-1}$ . Reaction with OH gives an acyl radical, C<sub>8</sub>F<sub>17</sub>C(O). Based upon the behavior of CH<sub>3</sub>C(O) and CF<sub>3</sub>C(O) radicals we assume that the atmospheric fate of C<sub>8</sub>F<sub>17</sub>C(O) radicals is addition of O<sub>2</sub> to give the acylperoxy radical C<sub>8</sub>F<sub>17</sub>C(O)O<sub>2</sub> which will react with either NO, NO<sub>2</sub>, or HO<sub>2</sub>.

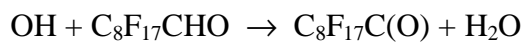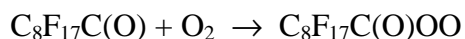

As described above, we assume that the reactions of  $\text{C}_8\text{F}_{17}\text{C}(\text{O})\text{O}_2$  with NO and  $\text{NO}_2$  have the same kinetics and mechanism as the corresponding reactions of  $\text{CH}_3\text{C}(\text{O})\text{O}_2$  radicals (6). Reaction with NO will give  $\text{NO}_2$  and  $\text{C}_8\text{F}_{17}\text{O}_2$  radicals.

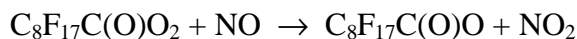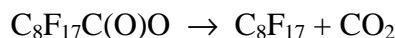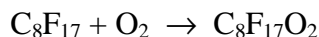

It has been shown by Sulbaek Andersen et al. (14,15) that the reaction of  $\text{C}_x\text{F}_{2x+1}\text{C}(\text{O})\text{O}_2$  ( $x=1-4$ ) with  $\text{HO}_2$  radicals in 100-700 Torr of air, or  $\text{O}_2$ , diluent at 296 K proceeds by three pathways leading to formation of  $\text{C}_x\text{F}_{2x+1}\text{C}(\text{O})\text{OH}$  and  $\text{O}_3$ ,  $\text{C}_x\text{F}_{2x+1}\text{C}(\text{O})\text{OOH}$  and  $\text{O}_2$ , and  $\text{C}_x\text{F}_{2x+1}\text{C}(\text{O})\text{O}$  radicals, OH radicals and  $\text{O}_2$ . The pathway leading to  $\text{C}_x\text{F}_{2x+1}\text{C}(\text{O})\text{OOH}$  and  $\text{O}_2$  is of minor (<3%) importance for the larger radicals and we assume it is of negligible importance for  $\text{C}_8\text{F}_{17}\text{C}(\text{O})\text{O}_2$ . The yield of  $\text{C}_x\text{F}_{2x+1}\text{C}(\text{O})\text{OH}$  decreases with increasing size of the  $\text{C}_x\text{F}_{2x+1}\text{C}(\text{O})\text{O}_2$  radical and appears to tend towards a limit of approximately 10% for large ( $x > 3$ )  $\text{C}_x\text{F}_{2x+1}\text{C}(\text{O})\text{O}_2$  radicals. For simplicity we assume here that the  $\text{C}_8\text{F}_{17}\text{C}(\text{O})\text{OH}$  acid yield in the  $\text{C}_8\text{F}_{17}\text{C}(\text{O})\text{O}_2 + \text{HO}_2$  reaction is the same as that observed in the reactions of  $\text{C}_3\text{F}_7\text{C}(\text{O})\text{O}_2$  and  $\text{C}_4\text{F}_9\text{C}(\text{O})\text{O}_2$  radicals with  $\text{HO}_2$  radicals, i.e., 10%. Furthermore, we assume that this yield is independent of temperature and that the kinetics of the  $\text{C}_8\text{F}_{17}\text{C}(\text{O})\text{O}_2 + \text{HO}_2$  reaction are the same as those for  $\text{CH}_3\text{C}(\text{O})\text{O}_2 + \text{HO}_2$  reaction.

#### **2.1.4 Atmospheric fate of $\text{C}_8\text{F}_{17}\text{O}_2$ radicals**

The sole atmospheric fate of  $\text{C}_8\text{F}_{17}\text{C}(\text{O})\text{O}$  radicals formed in the  $\text{C}_8\text{F}_{17}\text{C}(\text{O})\text{O}_2 + \text{HO}_2$  and  $\text{C}_8\text{F}_{17}\text{C}(\text{O})\text{O}_2 + \text{NO}$  reactions is elimination of  $\text{CO}_2$  to give  $\text{C}_8\text{F}_{17}$  radicals which will add  $\text{O}_2$  to give  $\text{C}_8\text{F}_{17}\text{O}_2$  radicals. As with other peroxy radicals, the atmospheric fate of

$C_8F_{17}O_2$  will be reaction with NO, NO<sub>2</sub>, HO<sub>2</sub>, and other peroxy radicals (e.g., CH<sub>3</sub>O<sub>2</sub>).

The reaction of  $C_8F_{17}O_2$  radicals with NO and HO<sub>2</sub> are assumed to proceed at the same rate as the corresponding reactions of CH<sub>3</sub>O<sub>2</sub> radicals. Reaction with NO<sub>2</sub> gives a thermally unstable peroxyxynitrate which will decompose rapidly to regenerate the reactants (this reaction need not be included in the model). Evidence has been presented that the reaction of  $C_8F_{17}O_2$  with alkyl peroxy radicals bearing an  $\alpha$ -hydrogen atom leads to the formation of the alcohol  $C_8F_{17}OH$  which will undergo heterogeneous decomposition via elimination of HF (16,17) to give the acid fluoride ( $C_7F_{15}C(O)F$ ) which undergoes hydrolysis to give the corresponding acid,  $C_7F_{15}C(O)OH$ . CH<sub>3</sub>O<sub>2</sub> is the most abundant  $\alpha$ -hydrogen containing peroxy radical in the atmosphere. An estimate of the rate constant for reaction of  $C_8F_{17}O_2$  with CH<sub>3</sub>O<sub>2</sub> can be obtained by assuming (i) all  $C_xF_{2x+1}O_2$  radicals react with CH<sub>3</sub>O<sub>2</sub> at the same rate and (ii) the rate of the cross reaction can be estimated from the rates of the self-reactions. Kinetic data are available for the self reactions of CF<sub>3</sub>O<sub>2</sub> and CH<sub>3</sub>O<sub>2</sub> radicals and the cross reaction rate can be estimated using the following expression (18):

$$k(CF_3O_2 + CH_3O_2) = 2\sqrt{k(CF_3O_2 + CF_3O_2) \times k(CH_3O_2 + CH_3O_2)}$$

Using  $k(CF_3O_2 + CF_3O_2) = 1.7 \times 10^{-12}$  (19) and  $k(CH_3O_2 + CH_3O_2) = 3.5 \times 10^{-13}$  (6) gives  $k(CF_3O_2 + CH_3O_2) = k(C_8F_{17}O_2 + CH_3O_2) = 1.5 \times 10^{-12} \text{ cm}^3 \text{ molecule}^{-1} \text{ s}^{-1}$  at 296 K. There are few available data with which to estimate the temperature dependence of the kinetics, or branching ratio, of the  $C_8F_{17}O_2 + CH_3O_2$  reaction. For the purposes of the present work we adopt a temperature dependence for the overall reaction and branching ratio which is the same as that for the CH<sub>3</sub>O<sub>2</sub> self reaction.

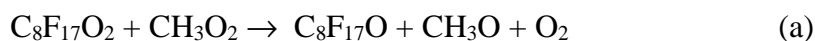

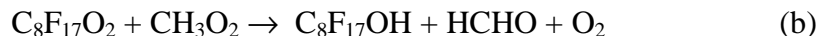

Hence,  $(k_a + k_b) = 4.0 \times 10^{-13} \exp(390/T)$  and  $k_a/k_b = 26.2 \exp(-1130/T)$  from which we derive  $k_a = 2.7 \times 10^{-12} \exp(-470/T)$  and  $k_b = 1.0 \times 10^{-13} \exp(660/T) \text{ cm}^3 \text{ molecule}^{-1} \text{ s}^{-1}$ .

The alcohol  $\text{C}_8\text{F}_{17}\text{OH}$  will undergo HF elimination and hydrolysis to give the acid  $\text{C}_7\text{H}_{15}\text{COOH}$  (PFOA) on a time scale similar to that for hydrolysis of  $\text{COF}_2$  in the atmosphere, i.e., approximately 5 days (pseudo first order rate  $= 2.3 \times 10^{-6} \text{ s}^{-1}$ ) (20). The alkoxy radical,  $\text{C}_8\text{F}_{17}\text{O}$ , formed by reaction of the  $\text{C}_8\text{F}_{17}\text{O}_2$  peroxy radical with either NO,  $\text{HO}_2$ , or  $\text{CH}_3\text{O}_2$  will eliminate  $\text{COF}_2$  and form the smaller fluorinated alkyl peroxy radical  $\text{C}_7\text{F}_{15}\text{O}_2$ . As with  $\text{C}_8\text{F}_{17}\text{O}_2$ , the dominant atmospheric fate of  $\text{C}_7\text{F}_{15}\text{O}_2$  will be conversion into the corresponding alkoxy radical,  $\text{C}_7\text{F}_{15}\text{O}$  (via reaction with NO,  $\text{HO}_2$ , and  $\text{CH}_3\text{O}_2$  radicals). The alkoxy radical  $\text{C}_7\text{F}_{15}\text{O}$  will eliminate  $\text{COF}_2$  and form the next smallest fluorinated alkyl peroxy radical  $\text{C}_6\text{F}_{13}\text{O}_2$ . A sequence of reactions ensues leading to the "unzipping" of the molecule via successive elimination of  $\text{COF}_2$  units (see bottom right in Figure 1). Each time through the cycle a fraction of the  $\text{C}_x\text{F}_{2x+1}\text{O}_2$  radicals will react with  $\text{CH}_3\text{O}_2$  giving  $\text{C}_x\text{F}_{2x+1}\text{OH}$  and hence the  $\text{C}_{x-1}\text{F}_{2x-1}\text{COOH}$  acid. If we assume that the atmospheric chemistry of  $\text{C}_x\text{F}_{2x+1}\text{O}_2$  radicals is the same as that of  $\text{C}_8\text{F}_{17}\text{O}_2$  then the yields of  $\text{C}_x\text{F}_{2x+1}\text{COOH}$  ( $x=1-6$ ) will be the same as that for  $\text{C}_7\text{F}_{15}\text{COOH}$ . The final step is formation of  $\text{CF}_3$  radicals which are then converted into  $\text{CF}_3\text{O}$  radicals and hence into  $\text{COF}_2$ .

The total perfluorocarboxylic acid yield from the atmospheric oxidation of 8:2 FTOH will be approximately  $Y_{\text{C}_8\text{F}_{17}\text{COOH}} + 7 Y_{\text{C}_7\text{F}_{15}\text{COOH}}$  where  $Y_{\text{C}_8\text{F}_{17}\text{COOH}}$  and  $Y_{\text{C}_7\text{F}_{15}\text{COOH}}$  are the molar yields of  $\text{C}_8\text{F}_{17}\text{COOH}$  and  $\text{C}_7\text{F}_{15}\text{COOH}$  estimated using the model described above.

## **2.1.5 Wet and dry deposition rates used in the model**

### **2.1.5.1 C<sub>8</sub>F<sub>17</sub>CH<sub>2</sub>CH<sub>2</sub>OH**

Based upon an estimated dimensionless air-water partition constant ( $K_{AW}$ ) of 316 the lifetime of 8:2 FTOH with respect to wet deposition was assessed to be 2.6 million years (1). Lei et al. (21) have recently measured  $K_{AW} = 20.42 \pm 2.09$  for 8:2 FTOH enabling us to reevaluate the importance of wet deposition using expression (I) (22,23).

$$k_{WD} = (R_r E e^{(-z/Z_x)}) / Z_x (H^* + \Phi) \quad (I)$$

$k_{WD}$  is the rate of wet deposition,  $R_r$  is the annual rainfall rate, taken to be  $3.2 \times 10^{-8}$  m/s,  $E$  is the enhancement factor due to evaporation of falling rain droplets, taken to be 1.33,  $z$  is the characteristic height of stratus clouds (3.5 km),  $Z_x$  is the scale height of the 8:2 FTOH (2.3 km),  $H^*$  is  $K_{AW}$ , and  $\Phi$  is the fraction of air volume occupied by liquid water.

Equation (I) gives  $k_{WD} = 1.98 \times 10^{-13} \text{ s}^{-1}$  which yields an expected lifetime from equation (II) of 160,000 years.

$$\tau_{WD} = 1/k_{WD} \quad (II)$$

Ellis et al. (1) reported a dry deposition lifetime 8.4 years. Lei et al. (21) have suggested from the volatility and octanol-air ( $K_{OA}$ ) partition coefficient that 8:2 FTOH will remain predominately in the gas phase, even at cold temperatures. Loss of 8:2 FTOH by wet or dry deposition will be of negligible importance and was not included in the model.

### **2.1.5.2 C<sub>8</sub>F<sub>17</sub>CH<sub>2</sub>CHO**

FTOHs have vapor pressures and  $K_{AW}$  values which are 1-2 orders of magnitude larger than their hydrocarbon counterparts (21,24). Decanal has a  $K_{aw}$  value of  $4.75 \times 10^{-2}$  (25) and hence the  $K_{aw}$  for C<sub>8</sub>F<sub>17</sub>CH<sub>2</sub>CHO will be in the range 0.5 – 5. Substituting into



equation (I) gives a rainout rate of  $8.08 \times 10^{-12} - 8.08 \times 10^{-13} \text{ s}^{-1}$  corresponding to a lifetime with respect to wet deposition, see equation (II), of 4,000 – 40,000 years.

The dry deposition velocity of  $\text{C}_8\text{F}_{17}\text{CH}_2\text{CHO}$  to a body of water can be estimated using equation (III).

$$v_d = 1/(r_a + r_b + r_s) \quad (\text{III})$$

$r_a + r_b$  are resistances to transport to the layer and are taken to be  $192$  and  $67 \text{ s m}^{-1}$ , respectively. The term  $r_s$  is the surface resistance of a gaseous substance and can be further defined as  $K_{AW}.r_w$  in which  $r_w$  is  $105 \text{ s m}^{-1}$ . The dry deposition velocity for the  $\text{C}_8\text{F}_{17}\text{CH}_2\text{CHO}$  was calculated to be  $(1.28 - 3.21) \times 10^{-3} \text{ m s}^{-1}$ . For the purposes of the present work we adopted a dry deposition velocity for  $\text{C}_8\text{F}_{17}\text{CH}_2\text{CHO}$  near the midpoint of the range given above,  $1.9 \times 10^{-3} \text{ m s}^{-1}$ .

The lifetime with respect to dry deposition can be estimated from the deposition velocity using equations (IV) and (V):

$$k_{DD} = v_d/Z_x \quad (\text{IV})$$

$$\tau_{DD} = 1/k_{DD} \quad (\text{V})$$

$Z_x$  is the depth of the atmosphere within which  $\text{C}_8\text{F}_{17}\text{CH}_2\text{CHO}$  is formed.  $\text{C}_8\text{F}_{17}\text{CH}_2\text{CHO}$  is produced from the oxidation of  $\text{C}_8\text{F}_{17}\text{CH}_2\text{CH}_2\text{OH}$  which occurs on a time scale of the order of 10 days. Hence,  $\text{C}_8\text{F}_{17}\text{CH}_2\text{CHO}$  will be formed throughout the troposphere,  $Z_x$  is approximately 14 km, and the lifetime of  $\text{C}_8\text{F}_{17}\text{CH}_2\text{CHO}$  with respect to dry deposition is of the order of 70 days. The actual lifetime with respect to dry deposition in the IMPACT model was 48 days (see Section 2.2 of the main paper).

It should be noted that aldehydes undergo hydration in the aqueous phase to yield geminal diols and this reaction is expected to be enhanced by partial fluorination. This

chemical reaction would enhance the water solubility of  $C_8F_{17}CH_2CHO$  when compared with the hydrocarbon counterpart. However, greatly offsetting this increased water solubility is the increased hydrophobicity of the polyfluorinated chain when compared with the hydrocarbon. Thus, hydration is not expected to impact the overall gas-water partition of  $C_8F_{17}CH_2CHO$  significantly.

#### **2.1.5.3 $C_8F_{17}CHO$**

Estimation of the significance of wet and dry deposition for  $C_8F_{17}CHO$  is complicated by the lack of physico-chemically relevant parameters for perfluorinated aldehydes. It is known that equivalent chain length perfluorocarbons have essentially the same vapor pressure ( $V_p$ ) but are much less soluble than non-fluorinated hydrocarbons (e.g.  $C_2F_6$  and  $C_2H_6$ ) (5). It seems unlikely that wet and dry deposition are significant loss mechanisms for  $C_8F_{17}CHO$  and these processes were not included in the model.

#### **2.1.5.4 $C_8F_{17}COOH$ (PFNA) and $C_7F_{15}COOH$ (PFOA)**

Rates for wet and dry deposition of PFCAs have been estimated by Franklin (26) and Hurley et al. (27). Franklin (26) estimated a wet deposition lifetime of 6.2 days (half-life of 4.3 days) for PFOA. As noted by Franklin (26), this value is based upon the assumption that PFOA is emitted into the atmosphere and if PFOA is formed in the atmosphere it is likely to have a lifetime longer than 6.2 days. Wet and dry deposition rates for PFOA and PFNA used in the IMPACT model were based on an effective Henry's law coefficient (defined as the ratio of gas-phase to the sum of direct and dissociated aqueous species) of  $2.46 \times 10^3 \text{ mol L}^{-1} \text{ atm}^{-1}$  from Franklin (26) and a global average dry deposition velocity of  $0.19 \text{ cm s}^{-1}$ . The wet and dry deposition used in the IMPACT model resulted in lifetimes of 17 days and 48 days with respect to wet and

dry deposition respectively, for a combined lifetime of 12 days. This is consistent with the estimate by Hurley et al. (27) of a combined wet and dry deposition lifetime of approximately 10 days.

## References

1. Ellis, D. A.; Martin, J. W.; Mabury, S. A.; Hurley, M. D.; Sulbaek Andersen, M. P.; Wallington, T. J. Atmospheric Lifetime of Fluorotelomer Alcohols. *Environ. Sci. Tech.* **2003**, 37, 3816-3820.
2. Le Bras, G.; Bossoutrot, V.; Magneron, I., "Study of the atmospheric fate of fluorinated alcohols". report to Telomer Research Program, July 2003.
3. DeMore W.B.; Sander S.P.; Golden, D.M.; Hampson, R.F.; Kurylo, M.J.; Howard, C.J.; Ravishankara, A.R.; Kolb, C.E.; Molina, M. J. **1997**, *JPL Publication No. 94-26*, NASA Jet Propulsion Lab., Pasadena, Calif.
4. Kelly T.; Bossoutrot, V.; Magneron, I.; Wirtz, K.; Treacy, J.; Mellouki, A.; Sidebottom, H.; Le Bras, G. A kinetic and mechanistic study of the reactions of OH radicals and Cl atoms with 3,3,3-trifluoropropanol under atmospheric conditions. *J. Phys. Chem. A.* **2005**, 109, 347-355.
5. Sellevåg, S. R.; Kelly, T.; Sidebottom, H.; Nielsen, C. J. A study of the IR and UV-Vis absorption cross-sections, photolysis and OH-initiated oxidation of CF<sub>3</sub>CHO and CF<sub>3</sub>CH<sub>2</sub>CHO. *Phys. Chem. Chem. Phys.*, **2004**, 6, 1243-1252.

- 
6. Tyndall, G. S.; Cox, R. A.; Granier, C.; Lesclaux, R.; Moortgat, G. K.; Pilling, M. J.; Ravishankara, A. R.; Wallington, T. J., Atmospheric chemistry of small organic peroxy radicals. *J. Geophys. Res.*, **2001**, *106*, 12157 –12182.
  7. Hasson, A. S.; Orlando, J. J.; Tyndall, G. S., A Product Yield Study of the reaction of HO<sub>2</sub> radicals with ethyl peroxy (C<sub>2</sub>H<sub>5</sub>O<sub>2</sub>), acetyl peroxy (CH<sub>3</sub>C(O)O<sub>2</sub>), and acetonyl peroxy (CH<sub>3</sub>C(O)CH<sub>2</sub>O<sub>2</sub>) radicals. *J. Phys. Chem. A*, 2004, *108*, 5979- 5989.
  8. Hashikawa, Y.; Kawasaki, M.; Waterland, R. L.; Sulbaek Andersen, M. P.; Nielsen, O. J.; Hurley, M. D.; Ball, J. C.; Wallington, T. J. Gas phase UV and IR absorption spectra of C<sub>x</sub>F<sub>2x+1</sub>CHO (x = 1-4). *J. Fluorine Chem.* **2004**, *125*, 1925-1932.
  9. Ellis, D. A.; Martin, J. W.; De Silva, A. O.; Mabury, S. A.; Hurley, M. D.; Sulbaek Andersen, M. P.; Wallington, T. J. Degradation of Fluorotelomer Alcohols: A Likely Atmospheric Source of Perfluorinated Carboxylic Acids. *Environ. Sci. Tech.* **2004**, *38*, 3316-3321.
  10. Scollard, D. J.; Treacy, J. J.; Sidebottom, H. W.; Balestra-Garcia, C.; Laverdet, G.; LeBras, G.; MacLeod, H.; Téton, S. Rate constants for the reactions of hydroxyl radicals and chlorine atoms with halogenated aldehydes. *J. Phys. Chem.* **1993**, *97*, 4683-4688.
  11. Dobe S., Kachatryan, L. A.; Berces, T. Kinetics of reactions of hydroxyl radicals with a series of aliphatic aldehydes. *Ber. Bunsenges. Phys. Chem.*, **1989**, *93*, 847-852.
  12. Sulbaek Andersen, M.P.; Nielsen, O. J.; Hurley, M.D.; Ball, J. C.; Wallington, T.

- 
- J.; Stevens, J. E.; Martin, J.W.; Ellis, D.A.; Mabury, S.A. Atmospheric chemistry of  $n\text{-C}_x\text{F}_{2x+1}\text{CHO}$  ( $x = 1, 3, 4$ ): reaction with Cl atoms, OH radicals and IR spectra of  $\text{C}_x\text{F}_{2x+1}\text{C}(\text{O})\text{O}_2\text{NO}_2$ . *J. Phys. Chem. A*, **2004**, *108*, 5189-5196.
13. Sulbaek Andersen, M. P.; Hurley, M. D.; Wallington, T. J.; Ball, J. C.; Martin, J. W.; Ellis, D. A.; Mabury, S. A.; Nielsen, O. J. Atmospheric chemistry of  $\text{C}_2\text{F}_5\text{CHO}$ : reaction with Cl atoms and OH radicals, IR spectrum of  $\text{C}_2\text{F}_5\text{C}(\text{O})\text{O}_2\text{NO}_2$ . *Chem. Phys. Lett.* **2003**, *379*, 28-36.
14. Sulbaek Andersen, M. P.; Hurley, M. D.; Wallington, T. J.; Ball, J. C.; Martin, J. W.; Ellis, D. A.; Mabury, S. A. Atmospheric chemistry of  $\text{C}_2\text{F}_5\text{CHO}$ : mechanism of the  $\text{C}_2\text{F}_5\text{C}(\text{O})\text{O}_2 + \text{HO}_2$  reaction. *Chem. Phys. Lett.* **2003**, *381*, 14-21.
15. Sulbaek Andersen, M. P.; Stenby, C.; Nielsen, O. J.; Hurley, M. D.; Ball, J. C.; Wallington, T. J.; Martin, J. W.; Ellis, D. A.; Mabury, S. A. Atmospheric Chemistry of  $n\text{-C}_x\text{F}_{2x+1}\text{CHO}$  ( $x = 1, 3, 4$ ): Mechanism of the  $\text{C}_x\text{F}_{2x+1}\text{C}(\text{O})\text{O}_2 + \text{HO}_2$  Reaction. *J. Phys. Chem. A*, **2004**, *108*, 6325-6330.
16. Lovejoy, E. R.; Huey, L. G.; Hanson, D. R. Atmospheric fate of  $\text{CF}_3\text{OH}$ . 2. heterogeneous reaction. *J. Geophys. Res.*, **1995**, *100*, 18775-18780.
17. Schneider, W. F.; Wallington, T. J.; Huie, R. E. Energetics and Mechanism of Decomposition of  $\text{CF}_3\text{OH}$ . *J. Phys. Chem.*, **1996**, *100*, 6097-6103.
18. Villenave, E.; Lesclaux, R. Kinetics of the cross reactions of  $\text{CH}_3\text{O}_2$  and  $\text{C}_2\text{H}_5\text{O}_2$  radicals with selected peroxy radicals. *J. Phys. Chem.*, **1996**, *100*, 14372-14382.
19. IUPAC Data Evaluation Committee <http://www.iupac-kinetic.ch.cam.ac.uk/datasheets/>
20. Wallington, T. J.; Schneider, W. F.; Worsnop, D. R.; Nielsen, O. J.; Sehested, J.;

- 
- DeBruyn, W.; ; Shorter, J. A. The environmental impact of CFC replacements - HFCs and HCFCs. *Environ. Sci. Tech.*, **1994**, 28, 320A-326A.
21. Lei, Y.D., Determination of Vapor Pressures, Octanol-Air and Water-Air Partition Coefficients for Polyfluorinated Sulfonamide, Sulfonamidoethanols and Telomer Alcohols. *J. Chem. Eng. Data*, **2004**.
22. Brimblecombe, P.; Dawson, G. A. Wet removal of highly soluble gases. *J. Atmos. Chem.*, **1984**, 2, 95-107.
23. Shepson, P. B.; Mackay, E.; Muthuramu, K. Henry's Law Constants and Removal Processes for Several Atmospheric  $\beta$ -Hydroxy Alkyl Nitrates. *Environ. Sci. Technol.*, **1996**, 30, 3618-3623.
24. Stock, N. L.; Ellis, D. A.; Deleebeeck, L.; Muir, D. C. G.; Mabury, S. A. Vapor Pressures of the Fluorinated Telomer Alcohols - Limitations of Estimation Methods. *Environ. Sci. Technol.*, **2004**, 38, 1693-1699.
25. Staudinger, J.; Roberts, P. V. A critical compilation of Henry's law constant temperature dependence relations for organic compounds in dilute aqueous solutions. *Chemosphere*, **2001**, 44, 561-576.
26. Franklin, J., Screening assessment of the potential for long range atmospheric transport of perfluorooctanoic acid. **2002**, Solvay Research and Technology.
27. Hurley, M. D.; Sulbaek Andersen, M. P.; Wallington, T. J.; Ellis, D. A.; Martin, J. W.; Mabury, S. A. Atmospheric Chemistry of Perfluorinated Carboxylic Acids: Reaction with OH Radicals and Atmospheric Lifetimes. *J. Phys. Chem. A*. **2004**, 108, 615-620.
